# Supplementary material
Source: publisher figshare collection journal article supplement (https://acs.figshare.com/ndownloader/files/5156059)
Supplement: Supplementary file 1 [file 5156059]

  MacMolPlt                       

 37 41  0  0  0  0  0  0  0  0  0 v2000
    2.9528   -0.9426    0.1896 C   0  0  0  0  0  0  0  0  0  0  0  0
    4.2559   -0.6361    0.5749 C   0  0  0  0  0  0  0  0  0  0  0  0
    4.6552    0.7050    0.6685 C   0  0  0  0  0  0  0  0  0  0  0  0
    3.7425    1.7354    0.3996 C   0  0  0  0  0  0  0  0  0  0  0  0
    2.4413    1.4210    0.0145 C   0  0  0  0  0  0  0  0  0  0  0  0
    2.2969   -2.1876    0.0441 C   0  0  0  0  0  0  0  0  0  0  0  0
    1.3362    2.2512   -0.2868 C   0  0  0  0  0  0  0  0  0  0  0  0
    0.3693   -0.3047   -0.4337 Co  0  0  0  0  0  0  0  0  0  0  0  0
    2.0766    0.0874   -0.1349 N   0  0  0  0  0  0  0  0  0  0  0  0
    0.2377    1.5631   -0.6132 N   0  0  0  0  0  0  0  0  0  0  0  0
   -0.9912   -0.5111    0.9005 C   0  0  0  0  0  0  0  0  0  0  0  0
   -1.7532   -0.8190   -0.3606 C   0  0  0  0  0  0  0  0  0  0  0  0
    1.0236   -2.0652   -0.3436 N   0  0  0  0  0  0  0  0  0  0  0  0
   -2.9765    0.0566   -0.6655 C   0  0  0  0  0  0  0  0  0  0  0  0
   -4.1661   -0.2519    0.2525 C   0  0  0  0  0  0  0  0  0  0  0  0
   -5.3930    0.6256   -0.0264 C   0  0  0  0  0  0  0  0  0  0  0  0
   -6.5818    0.3065    0.8858 C   0  0  0  0  0  0  0  0  0  0  0  0
    4.9512   -1.4376    0.8075 H   0  0  0  0  0  0  0  0  0  0  0  0
    5.6699    0.9468    0.9670 H   0  0  0  0  0  0  0  0  0  0  0  0
    4.0388    2.7759    0.4960 H   0  0  0  0  0  0  0  0  0  0  0  0
    2.7735   -3.1484    0.2156 H   0  0  0  0  0  0  0  0  0  0  0  0
    1.3712    3.3366   -0.2712 H   0  0  0  0  0  0  0  0  0  0  0  0
   -0.5774    2.1368   -0.8100 H   0  0  0  0  0  0  0  0  0  0  0  0
   -1.2901    0.4049    1.4111 H   0  0  0  0  0  0  0  0  0  0  0  0
   -0.8634   -1.3405    1.5938 H   0  0  0  0  0  0  0  0  0  0  0  0
   -1.0707   -0.6954   -1.3027 H   0  0  0  0  0  0  0  0  0  0  0  0
   -2.0135   -1.8814   -0.4334 H   0  0  0  0  0  0  0  0  0  0  0  0
    0.5169   -2.9428   -0.4238 H   0  0  0  0  0  0  0  0  0  0  0  0
   -3.2816   -0.0720   -1.7130 H   0  0  0  0  0  0  0  0  0  0  0  0
   -2.6982    1.1131   -0.5523 H   0  0  0  0  0  0  0  0  0  0  0  0
   -3.8569   -0.1293    1.2987 H   0  0  0  0  0  0  0  0  0  0  0  0
   -4.4438   -1.3098    0.1390 H   0  0  0  0  0  0  0  0  0  0  0  0
   -5.6945    0.5058   -1.0760 H   0  0  0  0  0  0  0  0  0  0  0  0
   -5.1158    1.6823    0.0901 H   0  0  0  0  0  0  0  0  0  0  0  0
   -6.3216    0.4507    1.9407 H   0  0  0  0  0  0  0  0  0  0  0  0
   -6.9052   -0.7338    0.7659 H   0  0  0  0  0  0  0  0  0  0  0  0
   -7.4405    0.9488    0.6645 H   0  0  0  0  0  0  0  0  0  0  0  0
  1  2  1  0  0  0  0
  1  6  1  0  0  0  0
  1  9  1  0  0  0  0
  2  3  1  0  0  0  0
  2 18  1  0  0  0  0
  3  4  1  0  0  0  0
  3 19  1  0  0  0  0
  4  5  1  0  0  0  0
  4 20  1  0  0  0  0
  5  7  1  0  0  0  0
  5  9  1  0  0  0  0
  6 13  1  0  0  0  0
  6 21  1  0  0  0  0
  7 10  1  0  0  0  0
  7 22  1  0  0  0  0
  8  9  1  0  0  0  0
  8 10  1  0  0  0  0
  8 11  1  0  0  0  0
  8 12  1  0  0  0  0
  8 13  1  0  0  0  0
  8 26  1  0  0  0  0
 10 23  1  0  0  0  0
 11 12  1  0  0  0  0
 11 24  1  0  0  0  0
 11 25  1  0  0  0  0
 12 14  1  0  0  0  0
 12 26  1  0  0  0  0
 12 27  1  0  0  0  0
 13 28  1  0  0  0  0
 14 15  1  0  0  0  0
 14 29  1  0  0  0  0
 14 30  1  0  0  0  0
 15 16  1  0  0  0  0
 15 31  1  0  0  0  0
 15 32  1  0  0  0  0
 16 17  1  0  0  0  0
 16 33  1  0  0  0  0
 16 34  1  0  0  0  0
 17 35  1  0  0  0  0
 17 36  1  0  0  0  0
 17 37  1  0  0  0  0
M  END
